# Supplementary material for: Unveiling therapeutic efficacy of extract and multi-targeting phytocompounds from Christella dentata (Forssk.) Brownsey & Jermy against multidrug-resistant Pseudomonas aeruginosa
Source: Royal Society of Chemistry journal article supplement (doi:10.1039/d3ra08367e), 2024-01-01
Supplement: d3ra08367e1.pdf [file d3ra08367e1.pdf]

## Supplementary materials on

### Unveiling therapeutic efficacy of extract and multi-targeting phytochemicals from *Christella dentata* (Forssk.) Brownsey & Jermy against multidrug-resistant *Pseudomonas aeruginosa*

Md. Mashiar Rahman, Md. Rakibul Islam, Md. Enamul Kabir Talukder, Md. Farhan Atif, Rahat Alam, A F M Shahab Uddin, K. M. Anis-Ul-Haque, Md. Saidul Islam, Mohammad Jashim Uddin and Shahina Akhter

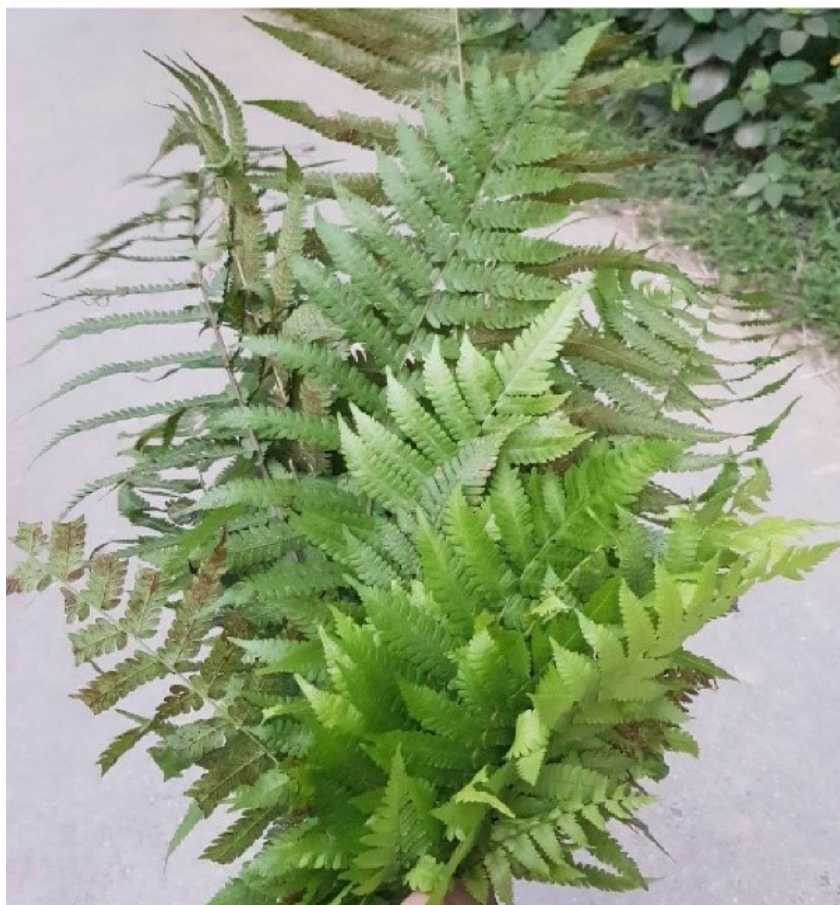

**Supplementary Figure S1.** Morphology of *Christella dentata* (Forssk.) Brownsey & Jermy.

**Supplementary Table S1.** Preliminary phytochemical screening of ethanol extract of *Christella dentata* (Forssk.) Brownsey & Jermy (EECD).

| Test name            | Observed color               | Result | Phytochemical nature |
|----------------------|------------------------------|--------|----------------------|
| Sodium hydroxide     | Colorless                    | +      | Flavonoids           |
| FeCl <sub>3</sub>    | Greenish-black               | +      | Tannins              |
| Lead acetate         | Grey-white precipitate       | +      | Tannins              |
| Salkowski's          | Brown layer at upper surface | +      | Terpenoids           |
| Salkowski's          | Blackish layer in the bottom | +      | Steroids             |
| Foaming              | Foam formation               | +      | Saponins             |
| Fehling's test       | Yellow-lime precipitate      | +      | Reducing sugar       |
| Benedict's test      | Greenish-yellow layer        | +      | Reducing sugar       |
| Sodium nitroprusside | Dark-brown                   | +      | Ketone               |
| Ninhydrin test       | Intense yellow color         | -      | Amino acid           |

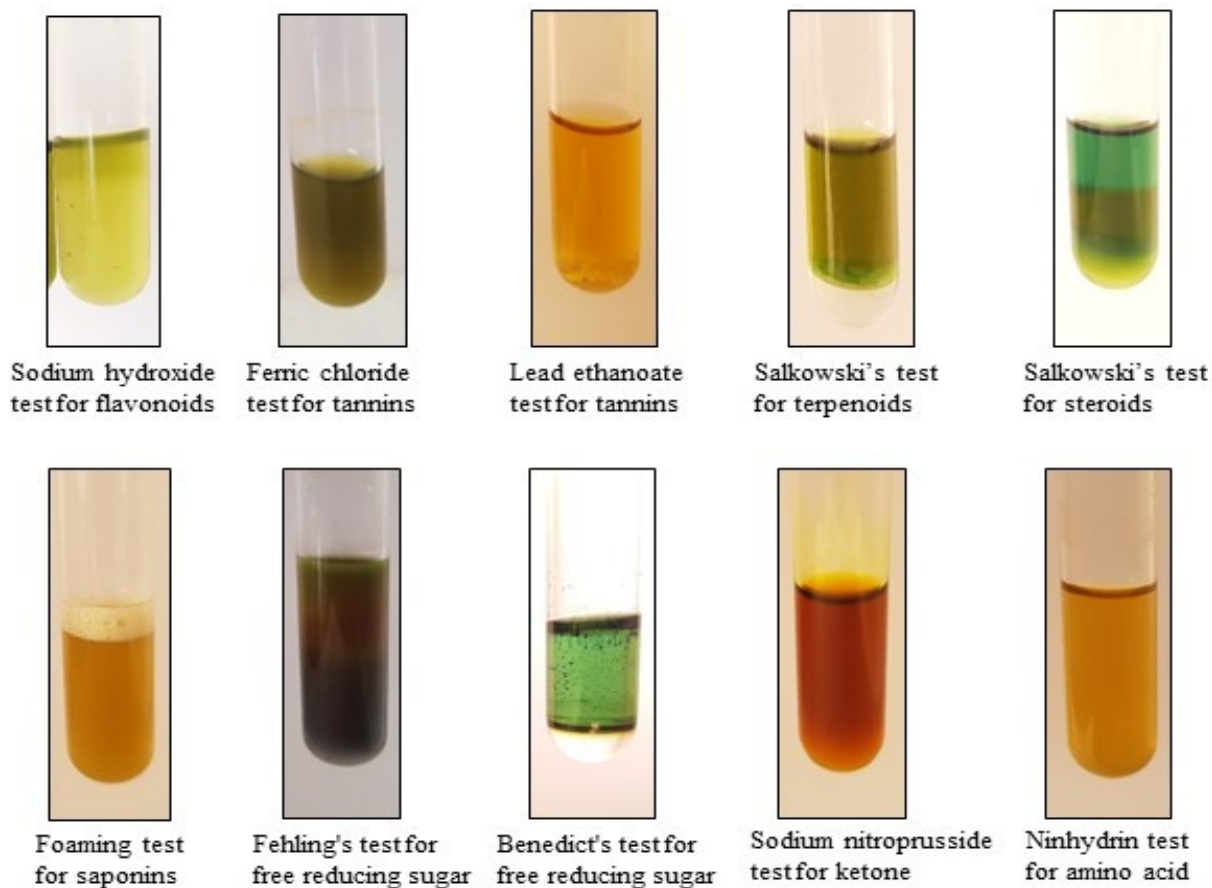

**Supplementary Figure S2.** Preliminary phytochemical screening (PPS) of EECD.

**Supplementary Table S2.** Fourier transform-infrared spectra (FT-IR) of EECD.

| Wavenumber (cm <sup>-1</sup> ) | Peak intensity | Functional group assignment                          |
|--------------------------------|----------------|------------------------------------------------------|
| 3650-3000                      | Broad          | Primary and secondary amines or amides (N-H stretch) |
| 2926.14                        | Weak           | Aldehyde (C-H)                                       |
| 2853.81                        | Weak           | Aldehyde (C-H)                                       |
| 1737.94                        | Weak           | Ester (C=O)                                          |
| 1638.60                        | Strong         | Aromatic (C=C)                                       |
| 1456.36                        | Weak           | Alkanes (-CH <sub>3</sub> bend)                      |
| 1402.31                        | Weak           | Aromatic alkene (C=C stretch)                        |
| 1076.33                        | Medium         | Alkyl halide (C-X)                                   |
| 594.10                         | Medium         | Alkyl halide (C-Br)                                  |
| 417.57                         | Weak           | Alkyl halide (C-X)                                   |

**Supplementary Table S3.** GC-MS annotated phytochemicals in EECD

| PN | Retention time | Similarity% | Area (%) | Structure, name and formula of the phytochemicals                                                                                                                  | Compound CID | Nature of phytochemicals |
|----|----------------|-------------|----------|--------------------------------------------------------------------------------------------------------------------------------------------------------------------|--------------|--------------------------|
| 1  | 5.06           | 60          | 0.76     | Unknown                                                                                                                                                            | -            | -                        |
| 2  | 5.117          | 91          | 1.38     | 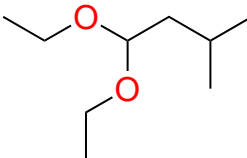<br>1,1-diethoxy-3-methylbutane (C <sub>9</sub> H <sub>20</sub> O <sub>2</sub> ) | 19695        | Alkane                   |
| 3  | 5.845          | 68          | 0.22     | Unknown                                                                                                                                                            | -            | -                        |
| 4  | 5.97           | 91          | 0.24     | <br>1,4-diethylbenzene (C <sub>10</sub> H <sub>14</sub> )                       | 7734         | Aromatic hydrocarbon     |
| 5  | 6.019          | 95          | 1.44     | <br>D-Limonene (C <sub>10</sub> H <sub>16</sub> )                               | 440917       | Monoterpene              |
| 6  | 7.762          | 91          | 0.22     | <br>Dodecane (C <sub>12</sub> H <sub>26</sub> )                                 | 8182         | Alkane                   |
| 7  | 8.535          | 74          | 0.27     | Unknown                                                                                                                                                            | -            | -                        |
| 8  | 8.802          | 94          | 0.63     | <br>Hexadecane (C <sub>16</sub> H <sub>34</sub> )                              | 11006        | Alkane                   |

|    |        |    |      |                                                                                                                                                                              |          |                           |
|----|--------|----|------|------------------------------------------------------------------------------------------------------------------------------------------------------------------------------|----------|---------------------------|
| 9  | 9.529  | 81 | 0.29 | Unknown                                                                                                                                                                      | -        | -                         |
| 10 | 10.57  | 79 | 3.42 | Unknown                                                                                                                                                                      | -        | -                         |
| 11 | 10.615 | 76 | 3.34 | Unknown                                                                                                                                                                      | -        | -                         |
| 12 | 10.702 | 93 | 5.29 | 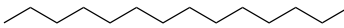<br>Tetradecane (C <sub>14</sub> H <sub>30</sub> )                                          | 12389    | Alkane                    |
| 13 | 10.885 | 62 | 0.98 | Unknown                                                                                                                                                                      | -        | -                         |
| 14 | 11.02  | 82 | 1.18 | Unknown                                                                                                                                                                      | -        | -                         |
| 15 | 11.638 | 90 | 0.81 | <br>Hexadecane (C <sub>16</sub> H <sub>34</sub> )                                          | 11006    | Straight-chain alkane     |
| 16 | 12.098 | 71 | 0.37 | Unknown                                                                                                                                                                      | -        | -                         |
| 17 | 12.688 | 91 | 1.17 | <br>Eicosane (C <sub>20</sub> H <sub>42</sub> )                                            | 8222     | Alkane                    |
| 18 | 13.203 | 76 | 0.26 | Unknown                                                                                                                                                                      | -        | -                         |
| 19 | 14.417 | 93 | 1.7  | <br>Neophytadiene (C <sub>20</sub> H <sub>38</sub> )                                       | 10446    | Alkene                    |
| 20 | 14.499 | 82 | 0.35 | Unknown                                                                                                                                                                      | -        | -                         |
| 21 | 15.021 | 90 | 0.49 | <br>3,7,11,15-Tetramethyl-2-hexadecen-1-ol (C <sub>20</sub> H <sub>40</sub> O)            | 5366244  | Acyclic diterpene alcohol |
| 22 | 15.691 | 92 | 1.2  | <br>Hexadecanoic acid, methyl ester (C <sub>17</sub> H <sub>34</sub> O <sub>2</sub> )    | 8181     | Fatty acid methyl ester   |
| 23 | 16.231 | 88 | 0.33 | Unknown                                                                                                                                                                      | -        | -                         |
| 24 | 16.701 | 92 | 3.24 | <br>Ethyl 13-methyltetradecanoate (C <sub>17</sub> H <sub>34</sub> O <sub>2</sub> )      | 71380066 | Esters                    |
| 25 | 16.81  | 98 | 0.4  | <br>1,2-Propanediol,3-(tetradecyloxy)- (C <sub>17</sub> H <sub>36</sub> O <sub>3</sub> ) | 64674    | Phenolics (alcohol)       |

|    |        |    |       |                                                                                                                                                                                     |          |                          |
|----|--------|----|-------|-------------------------------------------------------------------------------------------------------------------------------------------------------------------------------------|----------|--------------------------|
| 26 | 18.428 | 91 | 0.82  | 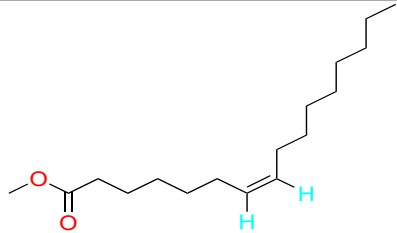 <p>7-Hexadecenoic Acid, methyl ester, (Z)- (C<sub>17</sub>H<sub>32</sub>O<sub>2</sub>)</p>       | 14029831 | Fatty acid methyl esters |
| 27 | 18.724 | 92 | 0.56  |  <p>Triacontane, 1-iodo- (C<sub>30</sub>H<sub>61</sub>I)</p>                                      | 12696145 | Alkyl iodide             |
| 28 | 19.409 | 58 | 0.65  | Unknown                                                                                                                                                                             | -        | -                        |
| 29 | 19.502 | 90 | 1.82  |  <p>(Z)-Ethyl heptadec-9-enoate (C<sub>19</sub>H<sub>36</sub>O<sub>2</sub>)</p>                   | 91692507 | Fatty acid ethyl esters  |
| 30 | 23.299 | 88 | 0.29  | Unknown                                                                                                                                                                             | -        | -                        |
| 31 | 24.889 | 81 | 0.19  | Unknown                                                                                                                                                                             | -        | -                        |
| 32 | 25.488 | 86 | 0.3   | Unknown                                                                                                                                                                             | -        | -                        |
| 33 | 29.201 | 89 | 36.09 | Unknown                                                                                                                                                                             | -        | -                        |
| 34 | 29.44  | 91 | 7.88  |  <p>Bicyclo [4.3.0] nonane, 2,2,6,7 - tetramethyl-7-hydroxy- (C<sub>13</sub>H<sub>24</sub>O)</p> | 536446   | Monoterpene (terpenoids) |
| 35 | 29.56  | 50 | 3.17  | Unknown                                                                                                                                                                             | -        | -                        |
| 36 | 29.625 | 48 | 1.5   | Unknown                                                                                                                                                                             | -        | -                        |
| 37 | 29.665 | 47 | 1.5   | Unknown                                                                                                                                                                             | -        | -                        |
| 38 | 29.72  | 54 | 3.31  | Unknown                                                                                                                                                                             | -        | -                        |
| 39 | 29.82  | 47 | 0.75  | Unknown                                                                                                                                                                             | -        | -                        |
| 40 | 29.953 | 52 | 2.52  | Unknown                                                                                                                                                                             | -        | -                        |
| 41 | 30.089 | 49 | 1.74  | Unknown                                                                                                                                                                             | -        | -                        |
| 42 | 30.13  | 54 | 0.66  | Unknown                                                                                                                                                                             | -        | -                        |
| 43 | 31.33  | 44 | 0.27  | Unknown                                                                                                                                                                             | -        | -                        |
| 44 | 31.685 | 45 | 0.36  | Unknown                                                                                                                                                                             | -        | -                        |
| 45 | 31.795 | 50 | 0.29  | Unknown                                                                                                                                                                             | -        | -                        |

|    |        |    |      |                                                                                    |         |               |
|----|--------|----|------|------------------------------------------------------------------------------------|---------|---------------|
| 46 | 32.685 | 96 | 0.17 | 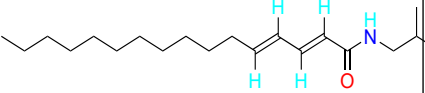 | 6442402 | N-acyl amines |
| 47 | 33.356 | 49 | 0.42 | Unknown                                                                            | -       | -             |
| 48 | 33.655 | 45 | 0.24 | Unknown                                                                            | -       | -             |
| 49 | 34.5   | 43 | 0.22 | Unknown                                                                            | -       | -             |
| 50 | 37.24  | 41 | 0.19 | Unknown                                                                            | -       | -             |

**Supplementary Table S4.** Molecular docking and MM-GBSA analysis

| Receptor    | Compounds CID         | Docking score | MM-GBSA                    |                         |                          |                       |                      |                         |                         |                     |
|-------------|-----------------------|---------------|----------------------------|-------------------------|--------------------------|-----------------------|----------------------|-------------------------|-------------------------|---------------------|
|             |                       |               | MM-GBSA $\Delta G$ Binding | $\Delta G$ Bind Coulomb | $\Delta G$ Bind Covalent | $\Delta G$ Bind Hbond | $\Delta G$ Bind Lipo | $\Delta G$ Bind Packing | $\Delta G$ Bind Solv GB | $\Delta G$ Bind vdW |
| <b>LasR</b> | CID 6442402           | -7.383        | -46.59                     | -18.15                  | 17.56                    | -1.86                 | -40.31               | 0                       | 25.63                   | -29.46              |
|             | CID 536446            | -7.285        | -16.56                     | -5.06                   | 6.44                     | -0.5                  | -24.04               | 0                       | 7                       | -0.4                |
|             | CID 7734              | -7.169        | -39.48                     | -2.46                   | 0.94                     | 0                     | -19.11               | -0.54                   | 7.05                    | -25.35              |
|             | CID 6249 (Ampicillin) | -7.003        | -7.17                      | 8.32                    | 18.75                    | -1.78                 | -27.74               | -2.77                   | 6.92                    | -8.87               |
| <b>LpxC</b> | CID 536446            | -6.984        | -31.5                      | -2.91                   | 0                        | -0.47                 | -13.41               | 0                       | 13.35                   | -28.06              |
|             | CID 7734              | -6.826        | -29.15                     | -0.37                   | 0                        | 0                     | -12.58               | 0                       | 9.62                    | -21.82              |
|             | CID 6249 (Ampicillin) | -6.333        | -29.02                     | 15.45                   | 0                        | -4.37                 | -10.07               | 0                       | 3.48                    | -33.51              |

**Supplementary Table S5.** Molecular features and toxicity of selected phytochemicals

| CID Number                  |                         | CID 536446           | CID 7734            | CID 6249 (Ampicillin) |
|-----------------------------|-------------------------|----------------------|---------------------|-----------------------|
| Physico-chemical Properties | MW (g/mol)              | 196.33               | 134.22              | 349.4                 |
|                             | Heavy atoms             | 14                   | 10                  | 24                    |
|                             | Aromatic heavy atoms    | 0                    | 6                   | 6                     |
|                             | RB                      | 0                    | 2                   | 5                     |
|                             | HBA                     | 1                    | 0                   | 5                     |
|                             | HBD                     | 1                    | 0                   | 3                     |
|                             | TPSA                    | 20.23 Å <sup>2</sup> | 0.00 Å <sup>2</sup> | 0.00 Å <sup>2</sup>   |
| Lipophilicity               | Log Po/w(MLOGP)         | 3.29                 | 4.47                | 0.75                  |
| Water solubility            | Log S (ESOL)            | -3.32                | -3.87               | -1.15                 |
| PK                          | GI absorption           | High                 | Low                 | Low                   |
| Drug likeness               | RO5                     | 0                    | 1                   | 0                     |
| Medicinal chemistry         | Synthetic accessibility | 3.02 (easy)          | 1 (very easy)       | 4.16 (easy)           |
| Toxicity and mutagenicity   | Hepatotoxicity          | I                    | I                   | I                     |
|                             | Immunogenicity          | I                    | I                   | I                     |

|  |              |   |   |   |
|--|--------------|---|---|---|
|  | Mutagenicity | I | I | I |
|  | Cytotoxicity | I | I | I |

MW = Molecular weight, I=Inactive, RB = Rotatable bond, HBA= Hydrogen bond acceptor, HBD = Hydrogen bond donor; PK = Pharmacokinetics; GI = Gastrointestinal; RO5 = Lipinski's rule of five.

**Supplementary Table S6.** The molecular docking bonded interactions and interacting residues of LasR and LpxC proteins with the best phytochemical and the control drug (ampicillin, CID 6249) were listed for each docked complex.

| Receptor name | Compounds CID | Interacting residues | Interacting bonds  |
|---------------|---------------|----------------------|--------------------|
| LasR          | CID 536446    | LEU36                | Hydrophobic        |
|               |               | GLY38                | Glycine            |
|               |               | LEU39                | Hydrophobic        |
|               |               | LEU40                | Hydrophobic        |
|               |               | TYR47                | Hydrophobic        |
|               |               | ALA50                | Hydrophobic        |
|               |               | ILE52                | Hydrophobic        |
|               |               | ARG61                | Charged (positive) |
|               |               | TYR64                | Hydrophobic H-bond |
|               |               | ASP65                | Charged (negative) |
|               |               | ALA70                | Hydrophobic        |
|               |               | VAL76                | Hydrophobic        |
|               |               | CYS79                | Hydrophobic        |
|               |               | LEU125               | Hydrophobic        |
|               |               | GLY126               | Glycine            |
| LasR          | CID 7734      | LEU36                | Hydrophobic        |
|               |               | GLY38                | Glycine            |
|               |               | LEU39                | Hydrophobic        |
|               |               | LEU40                | Hydrophobic        |
|               |               | TYR47                | Hydrophobic        |
|               |               | ALA50                | Hydrophobic        |
|               |               | ILE52                | Hydrophobic        |
|               |               | ARG61                | Charged (positive) |
|               |               | TYR64                | Hydrophobic        |
|               |               | ALA70                | Hydrophobic        |
|               |               | VAL76                | Hydrophobic        |
|               |               | CYS79                | Hydrophobic        |
|               |               | THR80                | Polar              |
|               |               | LEU125               | Hydrophobic        |
|               |               | GLY126               | Glycine            |

|        |              |        |                                       |
|--------|--------------|--------|---------------------------------------|
|        |              | ALA127 | Hydrophobic                           |
| LasR   | CID 6249     | LEU36  | Hydrophobic                           |
|        |              | GLY38  | Glycine                               |
|        |              | LEU39  | Hydrophobic                           |
|        |              | LEU40  | Hydrophobic                           |
|        |              | TYR47  | Hydrophobic                           |
|        |              | ALA50  | Hydrophobic                           |
|        |              | ILE52  | Hydrophobic                           |
|        |              | TYR56  | Hydrophobic H-bond                    |
|        |              | TRP60  | Hydrophobic                           |
|        |              | TYR64  | Hydrophobic                           |
|        |              | ALA70  | Hydrophobic                           |
|        |              | ASP73  | Charged (negative) H-bond-Salt bridge |
|        |              | THR75  | Polar                                 |
|        |              | VAL76  | Hydrophobic                           |
|        |              | TRP88  | Hydrophobic                           |
|        |              | TYR93  | Hydrophobic                           |
|        |              | PHE101 | Hydrophobic                           |
|        |              | ALA105 | Hydrophobic                           |
|        |              | LEU110 | Hydrophobic                           |
|        |              | THR115 | Polar                                 |
|        |              | LEU125 | Hydrophobic                           |
|        |              | GLY126 | Glycine                               |
|        |              | ALA127 | Hydrophobic                           |
| SER129 | Polar H-bond |        |                                       |
| LpxC   | CID 536446   | LEU18  | Hydrophobic                           |
|        |              | MET62  | Hydrophobic                           |
|        |              | ILE102 | Hydrophobic                           |
|        |              | THR190 | Polar H-bond                          |
|        |              | PHE191 | Hydrophobic                           |
|        |              | GLY192 | Glycine                               |
|        |              | ILE197 | Hydrophobic                           |
|        |              | LEU200 | Hydrophobic                           |
|        |              | ALA206 | Hydrophobic                           |
|        |              | GLY209 | Glycine                               |
|        |              | SER210 | Polar                                 |
|        |              | ASN213 | Polar                                 |
|        |              | ALA214 | Hydrophobic                           |
|        |              | VAL216 | Hydrophobic                           |
| LpxC   | CID 7734     | LEU18  | Hydrophobic                           |
|        |              | ILE102 | Hydrophobic                           |
|        |              | THR190 | Polar                                 |
|        |              | PHE191 | Hydrophobic                           |
|        |              | GLY192 | Glycine                               |
|        |              | PHE193 | Hydrophobic                           |
|        |              | ASP196 | Charged (negative)                    |
|        |              | ILE197 | Hydrophobic                           |



|      |          |        |                                |
|------|----------|--------|--------------------------------|
|      |          | LEU200 | Hydrophobic                    |
|      |          | ALA206 | Hydrophobic                    |
|      |          | GLY209 | Glycine                        |
|      |          | SER210 | Polar                          |
|      |          | ASN213 | Polar                          |
|      |          | ALA214 | Hydrophobic                    |
|      |          | VAL216 | Hydrophobic                    |
| LpxC | CID 6249 | LEU18  | Hydrophobic                    |
|      |          | MET62  | Hydrophobic H-bond             |
|      |          | SER63  | Polar                          |
|      |          | THR75  | Polar                          |
|      |          | GLU77  | Charged (negative)             |
|      |          | HIS78  | Polar                          |
|      |          | ILE102 | Hydrophobic                    |
|      |          | PHE160 | Hydrophobic                    |
|      |          | THR190 | Polar H-bond                   |
|      |          | PHE191 | Hydrophobic H-bond             |
|      |          | GLY192 | Glycine                        |
|      |          | ALA206 | Hydrophobic                    |
|      |          | ALA214 | Hydrophobic                    |
|      |          | HIP237 | Charged (positive) H-bond      |
|      |          | LYS238 | Charged (positive) Salt bridge |
|      |          | ASP241 | Charged (negative)             |
|      |          | HIS264 | Polar                          |
